# Supplementary material
Source: PubMed Central journal article supplement (PMC8483761)

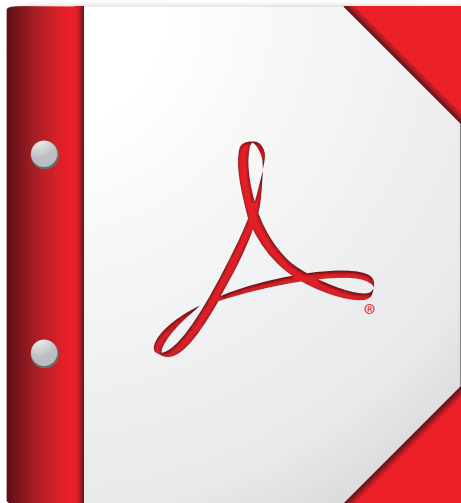

为获得最佳体验，请在 **Acrobat X**、**Adobe Reader X**  
或更高版本中打开此 **PDF** 包。

立即下载 Adobe Reader !

Supplement: jci-131-150211-s153.pdf [file jci-131-150211-s153.pdf]
